# Supplementary material
Source: PubMed Central journal article supplement (PMC6424337)
Supplement: NIHMS978304-supplement-supplemental.pdf [file NIHMS978304-supplement-supplemental.pdf]

## Supplemental Information

### **Epidermal Growth Factor Receptor Extracellular Domain**

### **Mutations in Glioblastoma Present Opportunities**

### **for Clinical Imaging and Therapeutic Development**

**Zev A. Binder, Amy Haseley Thorne, Spyridon Bakas, E. Paul Wileyto, Michel Bilello, Hamed Akbari, Saima Rathore, Sung Min Ha, Logan Zhang, Cole J. Ferguson, Sonika Dahiya, Wenya Linda Bi, David A. Reardon, Ahmed Idbah, Joerg Felsberg, Bettina Hentschel, Michael Weller, Stephen J. Bagley, Jennifer J.D. Morrissette, MacLean P. Nasrallah, Jianhui Ma, Ciro Zanca, Andrew M. Scott, Laura Orellana, Christos Davatzikos, Frank B. Furnari, and Donald M. O'Rourke**

**Table S1. Related to Table 1.** Patient demographics of the discovery GBM cohort at UPenn.

| Variable        |               | n   | %  |
|-----------------|---------------|-----|----|
| Gender          | Female        | 103 | 40 |
|                 | Male          | 157 | 60 |
| Age (year)      | 0-29          | 2   | 1  |
|                 | 30-49         | 26  | 10 |
|                 | 50-69         | 157 | 60 |
|                 | 70+           | 75  | 29 |
| <i>MGMT</i>     | Unmethylated  | 122 | 47 |
|                 | Methylated    | 87  | 33 |
|                 | Unknown       | 51  | 20 |
| <i>EGFR</i>     | Non-Amplified | 162 | 62 |
|                 | Amplified     | 98  | 38 |
| EGFRvIII        | Negative      | 154 | 59 |
|                 | Postive       | 50  | 19 |
|                 | Unknown       | 56  | 22 |
| Misense Mutants | A289D/T/V     | 15  | 6  |
|                 | R108G/K       | 9   | 3  |
|                 | G598V         | 6   | 2  |

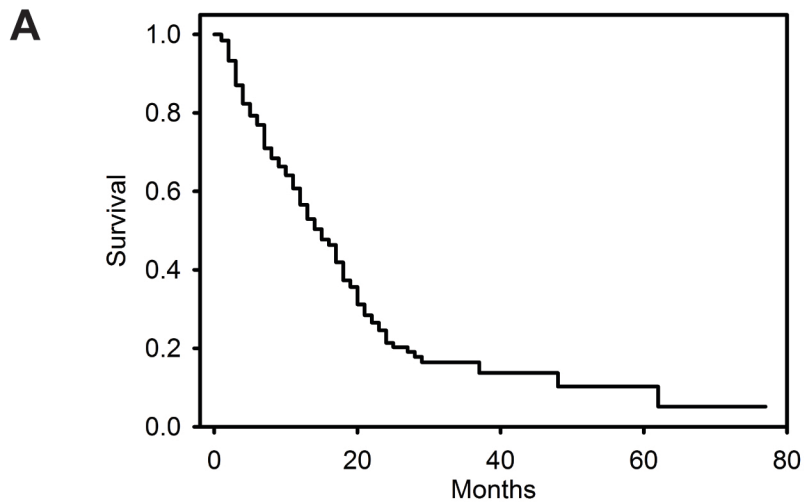

Number at Risk: 251 40 5 2 0

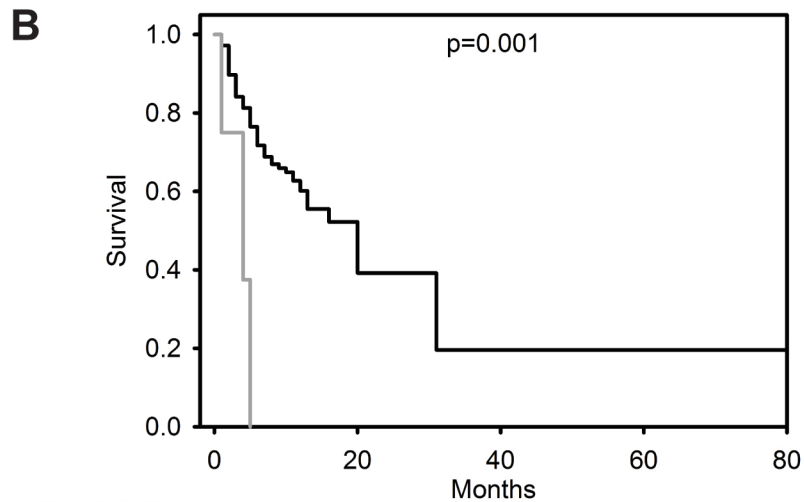

Number at Risk:  
 EGFR 107 4 1 1 1  
 EGFR A289D/T/V 4 0 0 0 0

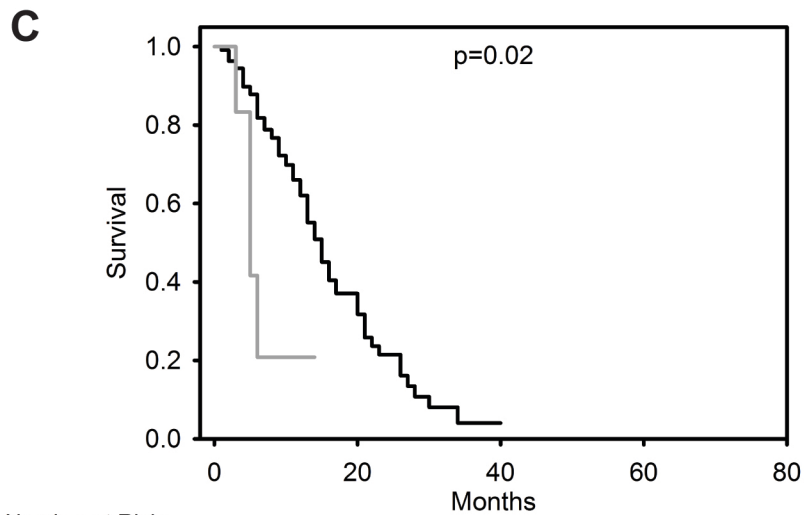

Number at Risk:  
 EGFR 110 21 1 0 0  
 EGFR A289D/T/V 6 0 0 0 0

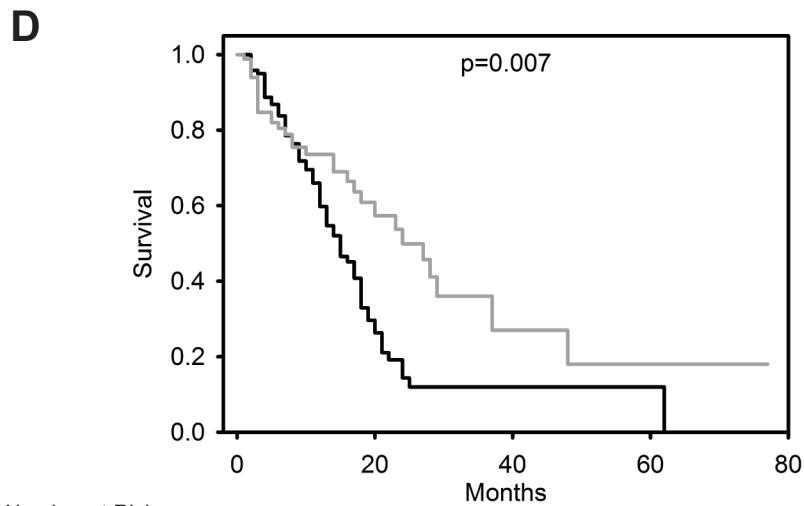

Number at Risk:  
 MGMT Unmethylated 121 18 2 1 0  
 MGMT Methylated 86 17 3 1 0

**Figure S1. Related to Figure 1. (A-D)** Kaplan-Meier survival curves for the total cohort of 260 *IDH1* wildtype, de novo GBMs (A), the validation UPenn cohort (B), the validation French cohort (C), and *MGMT* methylated versus *MGMT* unmethylated GBM patients (D).

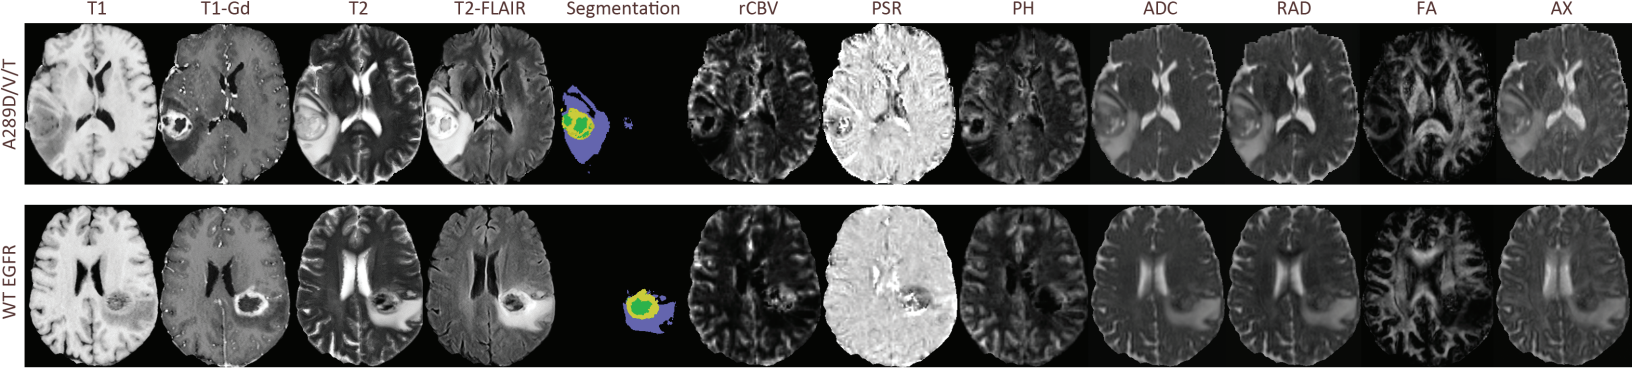

**Figure S2. Related to Figure 2.** Representative images for the basic and advanced imaging modalities included in the final analyses. Abbreviations: T1-Gd=T1-weighted MRI with gadolinium; T2-FLAIR=T2-weighted fluid Attenuated Inversion Recovery MRI; rCBV=relative cerebral blood volume; PSR=percentage signal recovery; PH=peak height; ADC=apparent diffusion coefficient; RAD=radial diffusivity; FA=fractional anisotropy; AX=axial diffusivity.

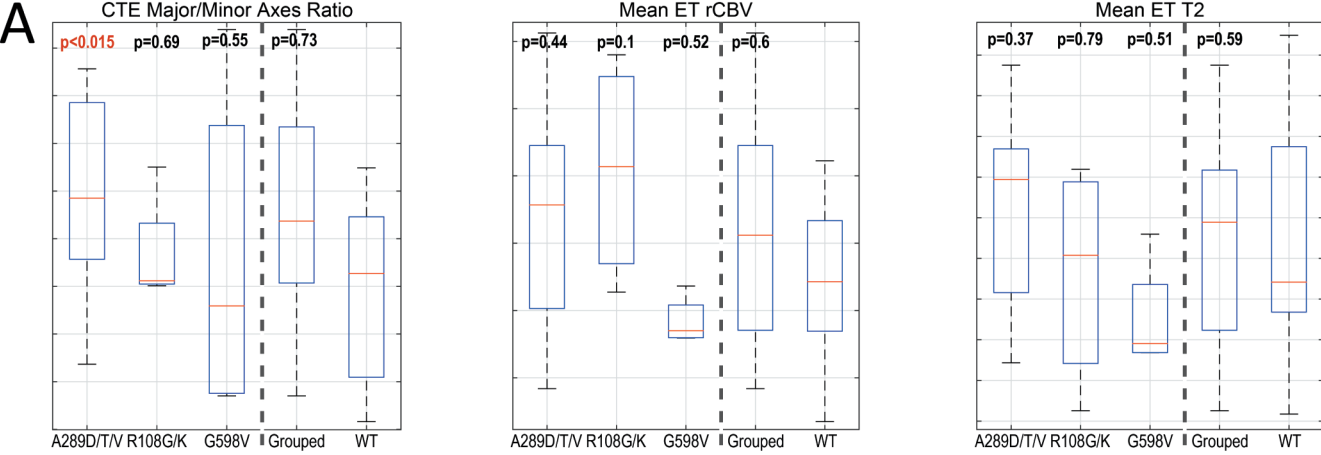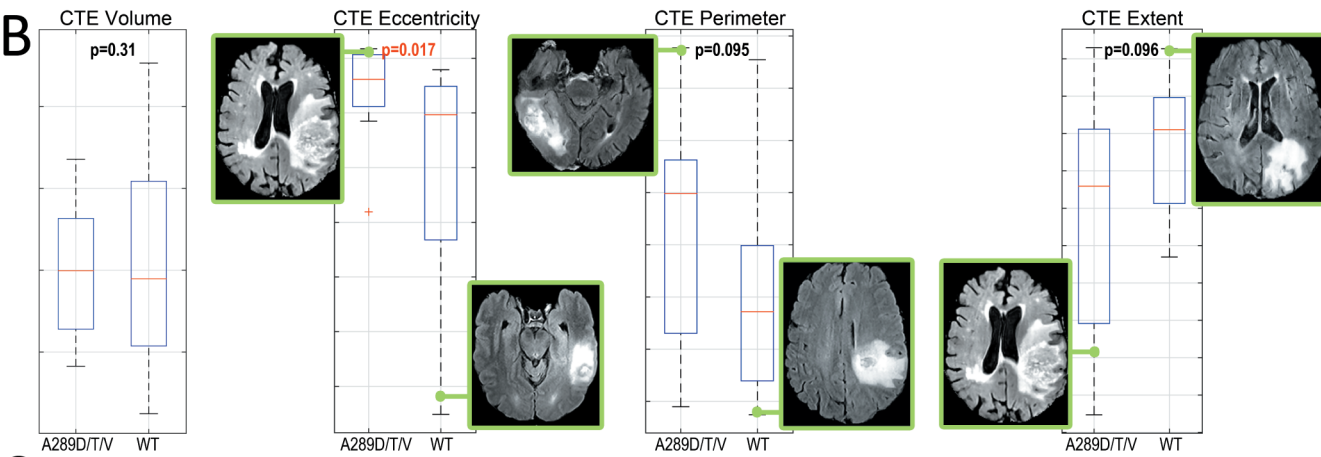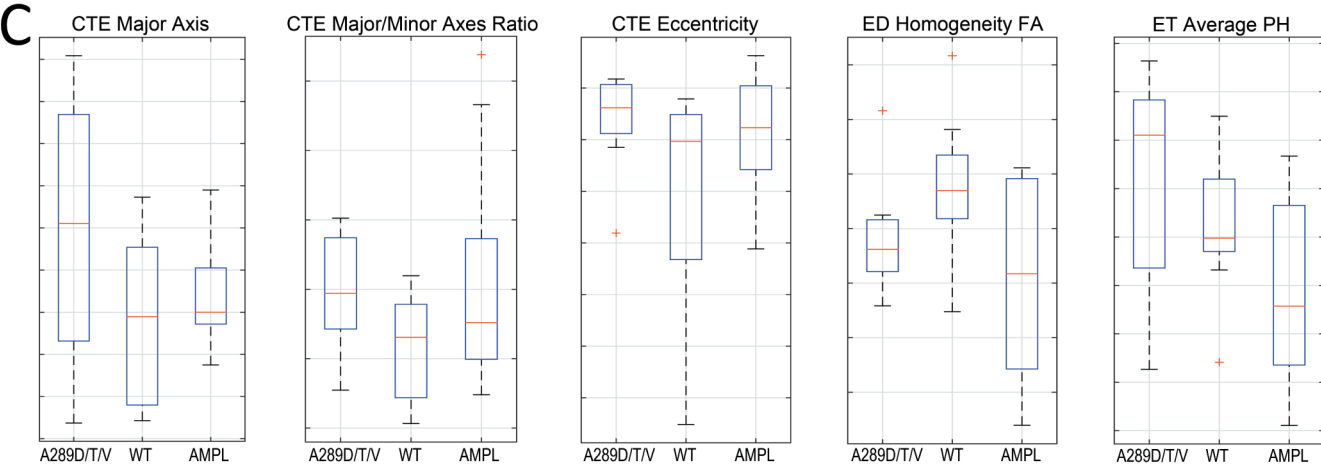

**D**

|                   | CTE Major Axis | CTE Major/Minor Axes Ratio | CTE Eccentricity | ED Homogeneity FA | ET Average PH |
|-------------------|----------------|----------------------------|------------------|-------------------|---------------|
| A289D/T/V vs AMPL | 0.0844         | <b>0.0086</b>              | <b>0.0215</b>    | 0.3007            | <b>0.0221</b> |
| A289D/T/V vs WT   | 0.7702         | 0.0605                     | <b>0.0375</b>    | <b>0.0444</b>     | 0.1519        |
| WT vs AMPL        | 0.0669         | 0.9865                     | 0.4943           | <b>0.0141</b>     | 0.0899        |

**Figure S3. Related to Figure 2.** (A) Feature comparison across each individual EGFR missense mutation, the grouped mutations, and WT EGFR, for the major: minor axes ratio of the CTE (left), the average rCBV signal in the ET (middle), and the average T2 signal in the ET (right). P-values represent each condition versus WT EGFR. (B) While the volume distribution of the CTE is similar between the EGFR<sup>A289D/T/V</sup> and the WT EGFR cohorts, the higher eccentricity and perimeter values, combined with lower extent values, in the EGFR<sup>A289D/T/V</sup> cohort present a picture of more irregularly-shaped tumors, suggestive of more invasive tumors. Insets show representative T2-FLAIR MRI examples of both EGFR<sup>A289D/T/V</sup> and WT EGFR tumors demonstrating corresponding plotted features. (C) Comparison across EGFR<sup>A289D/T/V</sup>, WT EGFR, and EGFR-amplified patients. EGFR<sup>A289D/T/V</sup> mutant cases demonstrated distinct distributions from the other two populations, with the exception of the homogeneity in the FA signal of the ED region. (D) Two-sided T test p values for the features in plotted in (C). Feature definitions: The “Eccentricity” defines the circularity of the assessed shape, i.e. eccentricity value of 0 describes a perfect circle and larger values represent more elongated shapes. The “Perimeter” describes the distance around the boundary of the assessed shape. The “Extent” is the ratio of the area of the assessed shape to the area of its rectangular bounding box. The top and bottom of each “box” depict the 3rd and 1st quartile of the represented measure, respectively, whereas the red line within each box indicates the median value. The fact that these are not necessarily at the center of each box indicates the skewness of the distribution over different cases. The “whiskers” drawn above and below each box depict the extremal observations still within 1.5 times the interquartile range, above the 3rd or below the 1st quartile. Observations beyond the whiskers are marked as outliers with a “+” sign. Abbreviations: CTE=complete tumor extent; ET=enhancing tumor; rCBV=relative cerebral blood volume; ED=peritumoral edematous/invaded region; FA=fractional anisotropy; PH=peak height.

**Table S3, related to Figure 2.** Selected quantitative imaging phenomic features.

| EGFR alteration      | Tumor sub-region | Feature Observation                                                      | p value |
|----------------------|------------------|--------------------------------------------------------------------------|---------|
| R108G/K vs A289D/T/V | NET              | higher T1                                                                | 0.0029  |
| R108G/K vs WT EGFR   | ET               | higher Peak Height (measurement extracted from perfusion - DSC-MRI)      | 0.0276  |
| R108G/K vs WT EGFR   | ED               | lower Homogeneity in the Fractional Anisotropy signal                    | 0.0487  |
| A289D/T/V vs WT EGFR | ED               | lower Homogeneity in the Fractional Anisotropy signal                    | 0.0283  |
| R108G/K vs WT EGFR   | NET              | higher standard deviation (i.e. more variance) in the Peak Height signal | 0.0485  |
| A289D/T/V vs WT EGFR | NET              | higher standard deviation (i.e. more variance) in the Peak Height signal | 0.0309  |
| G598V vs WT EGFR     | ET               | lower average T1 signal                                                  | 0.0125  |
| A289D/T/V vs WT EGFR | ET               | lower average T1 signal                                                  | 0.0081  |
| A289D/T/V vs WT EGFR | CTE              | Major/Minor Axis                                                         | 0.0149  |
| G598V vs WT EGFR     | ET               | higher relative enhancement (T1Gd-T1)                                    | 0.0326  |
| A289D/T/V vs WT EGFR | ET               | higher relative enhancement (T1Gd-T1)                                    | 0.0374  |
| G598V vs WT EGFR     | ED               | higher relative enhancement (T1Gd-T1)                                    | 0.0026  |
| A289D/T/V vs WT EGFR | ED               | higher relative enhancement (T1Gd-T1)                                    | 0.0441  |
| A289D/T/V vs WT EGFR | NET              | higher relative enhancement (T1Gd-T1)                                    | 0.0236  |
| A289D/T/V vs WT EGFR | CTE              | longer Major Axis                                                        | 0.0064  |
| A289D/T/V vs WT EGFR | CTE              | higher Eccentricity                                                      | 0.0176  |

The described feature observations are the ones denoted as statistically significant ( $p \leq 0.05$ ), based on the applied multivariate approach for feature selection (Gaonkar and Davatzikos, 2013) and after selection based on radiographic interpretation. Furthermore, this table denotes the tumor sub-regions in which each of these feature observations were captured, as well as the pairs of EGFR variants that these features were found as statistically significant. Abbreviations: ED, peritumoral edematous/infiltrated tissue; ET, enhancing part of tumor core; NET, non-enhancing part of tumor core; CTE, complete tumor extent, encompassing of all ET, NET, and ED; Tumor core, typically resected tumor.

**A**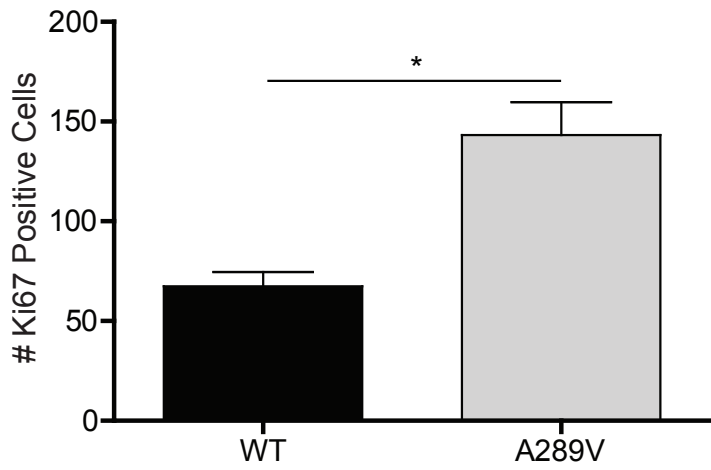**B**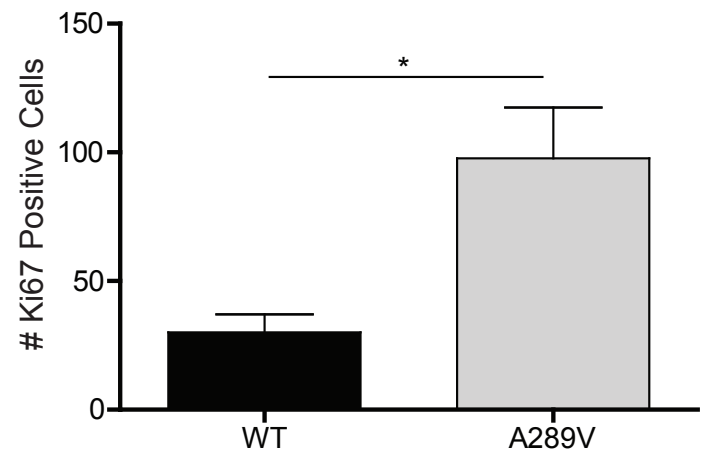**C**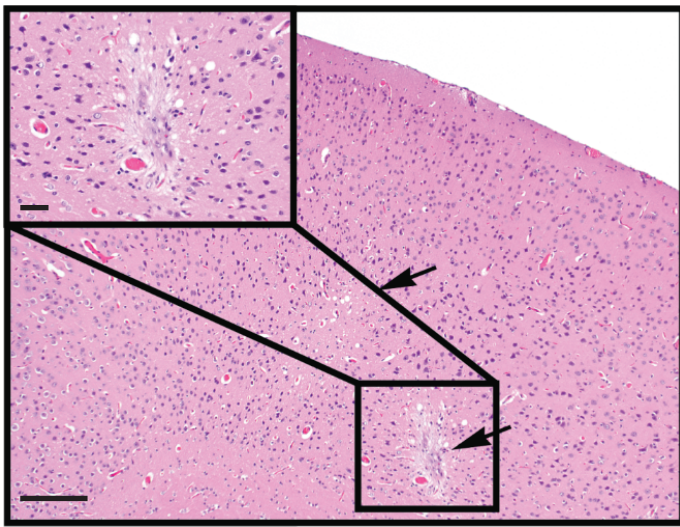**D**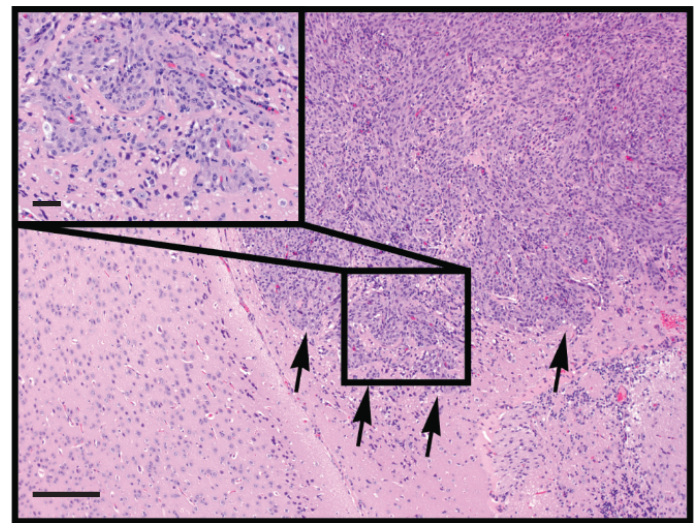

**Figure S4. Related to Figure 3.** (A and B) Quantification of Ki67 positive cells from U87 tumors from Figure 3C (A) and HK281 tumors from Figure 3D (B). Error bars indicate +/- standard error of the mean. (C and D) H&E images at Day 14 of animals injected with U87 WT EGFR (C) and U87 EGFR<sup>A289V</sup> (D). The WT EGFR demonstrated scar tissue from the needle track and a small focus of tumor cells (arrows and insert). The EGFR<sup>A289V</sup> missense mutation formed a densely cellular invasive growth effacing and infiltrating unilaterally the frontal cortex (arrows and insert). Scale bar low magnification = 170  $\mu$ m. Scale bar high magnification = 70  $\mu$ m.



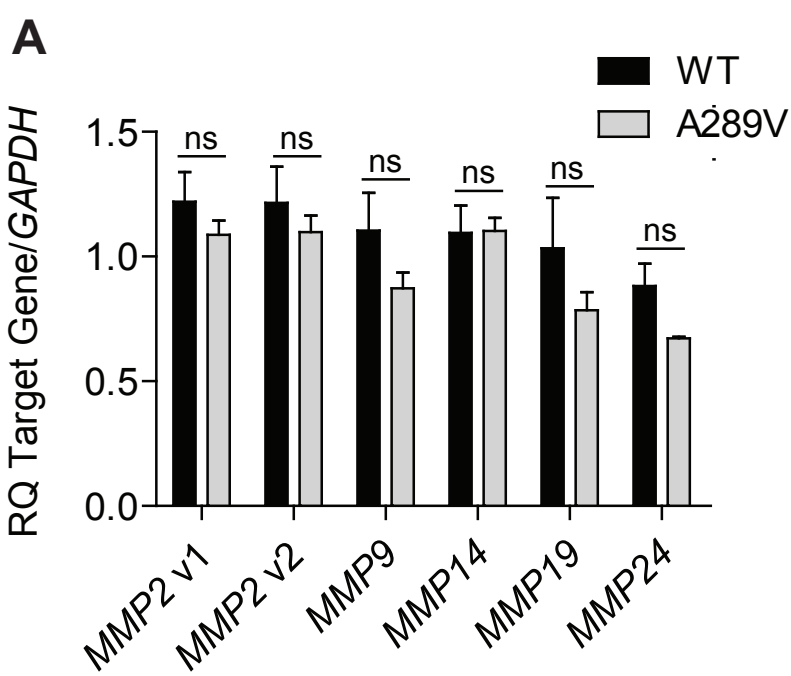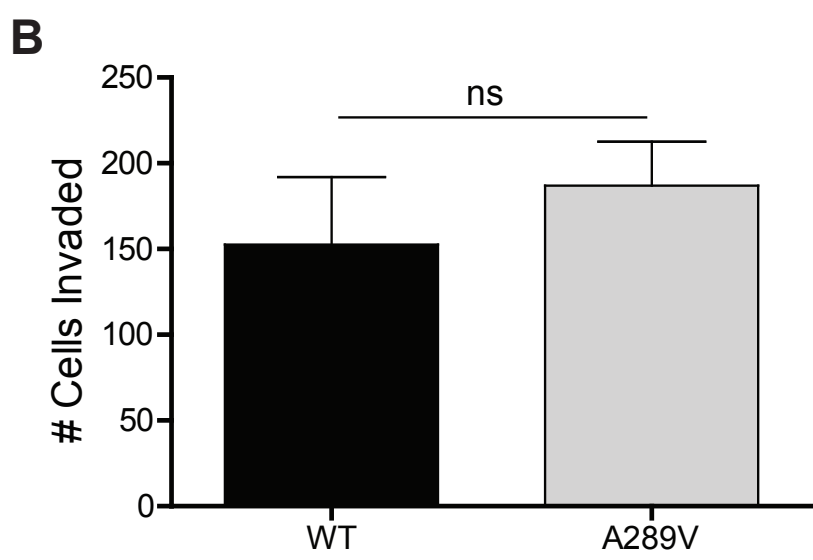

**Figure S5. Related to Figure 4.** Effect of EGFR<sup>A289V</sup> on MMP expression. (A) Real time quantitative PCR analysis of MMP2, MMP9, MMP14, MMP19, and MMP24 in U87 glioma cells expressing either WT EGFR or EGFR<sup>A289V</sup>. Data shown are fold change gene expression relative to GAPDH. (B) Quantification of invaded U87 glioma cells was determined using a modified Boyden Transwell chamber assay coated with matrigel. Error bars are standard error of the mean of at least three replicates and represent at least three independent experiments. ns = not significant.

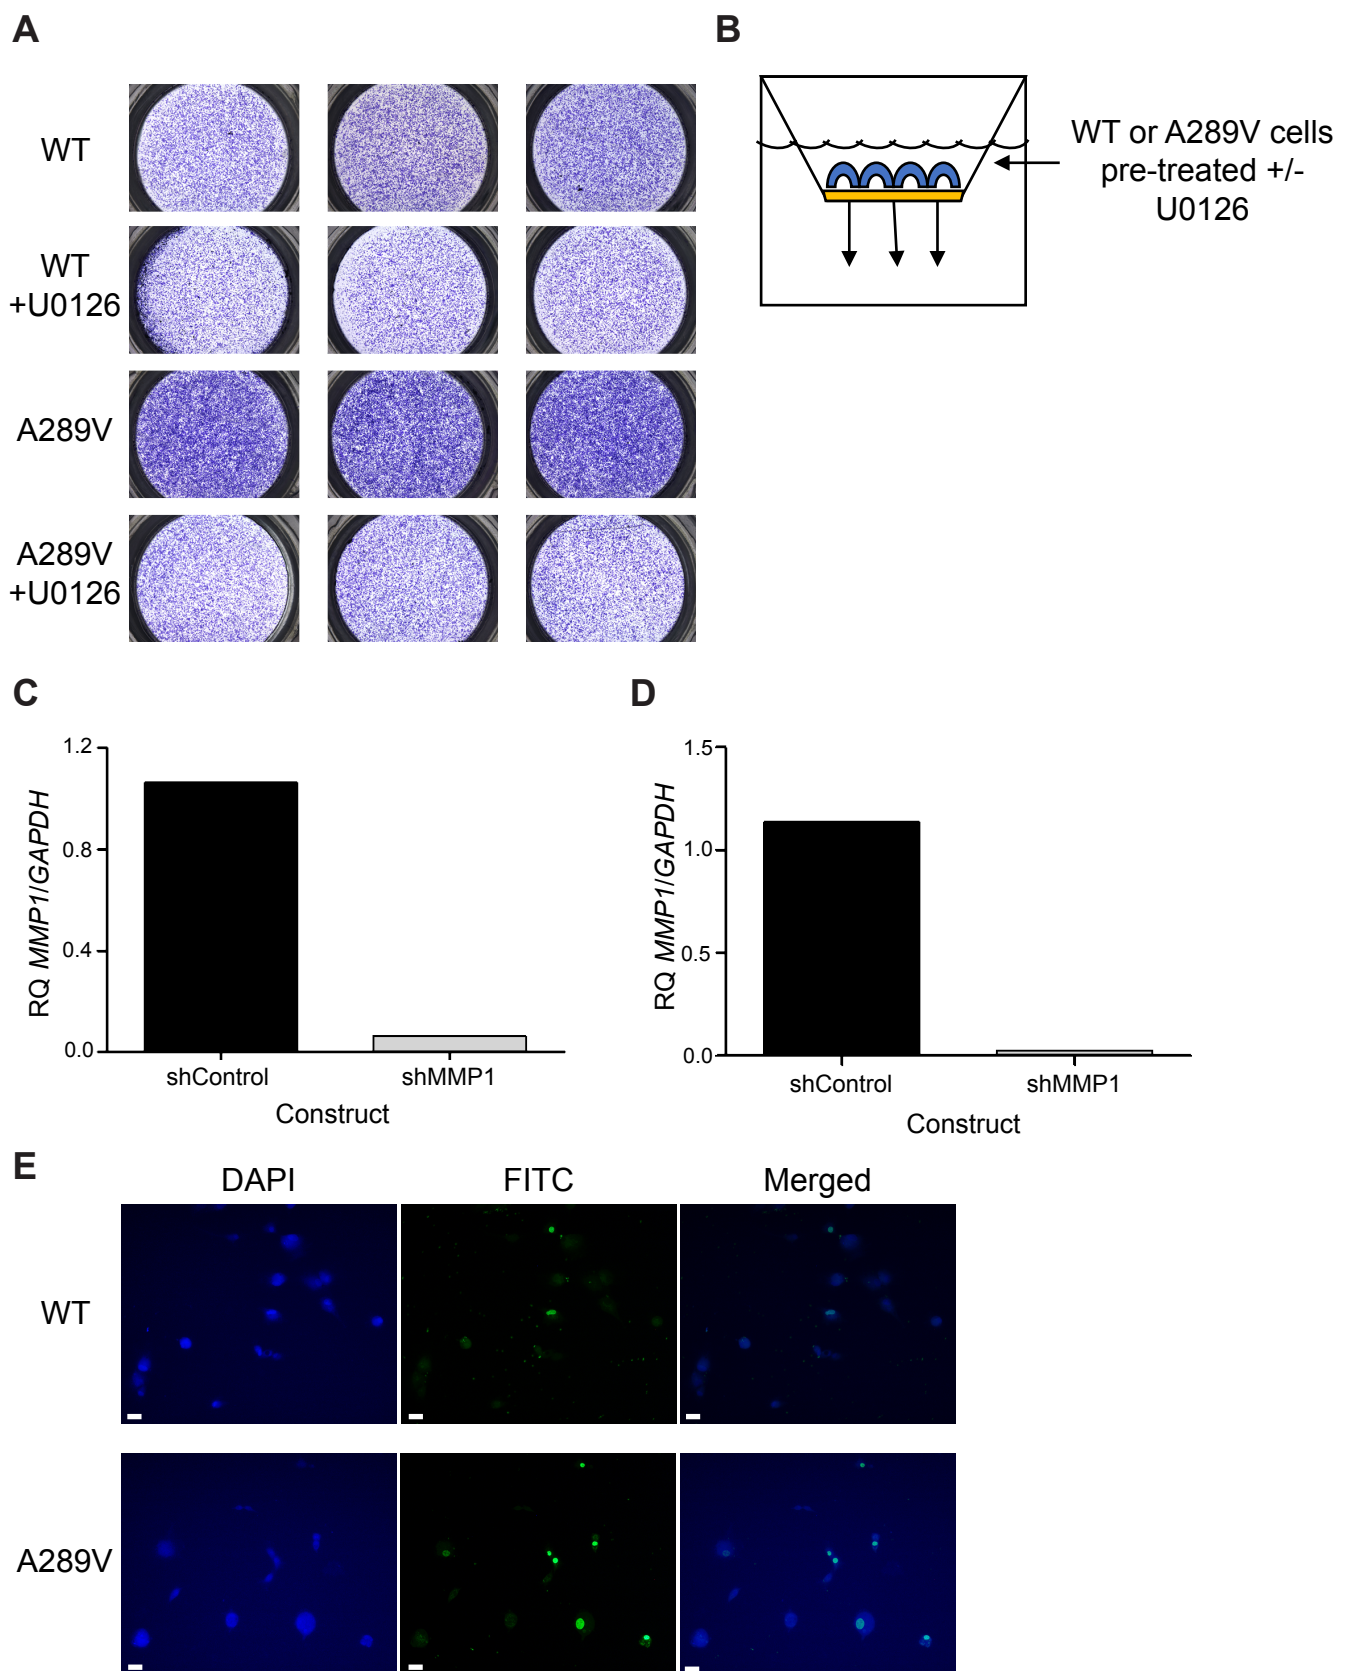

**Figure S6. Related to Figure 5.** (A) Representative images from Figure 5C showing crystal violet stained HK281 GBM-spheres post-invasion. (B) Schematic of basic experimental set-up using modified Boyden Transwell chambers. (C and D) Real time quantitative PCR analysis of *MMP1* in EGFR<sup>A289V</sup> expressing U87 glioma cells (C) and HK281 GBM-spheres (D) transduced with shMMP1 or shControl. Data shown are fold change gene expression relative to *GAPDH*. (E) Representative images showing Hoechst and BrdU stained U87 WT EGFR (top) and U87 A289V (bottom) following BrdU incorporation. Scale bar = 22  $\mu$ m.

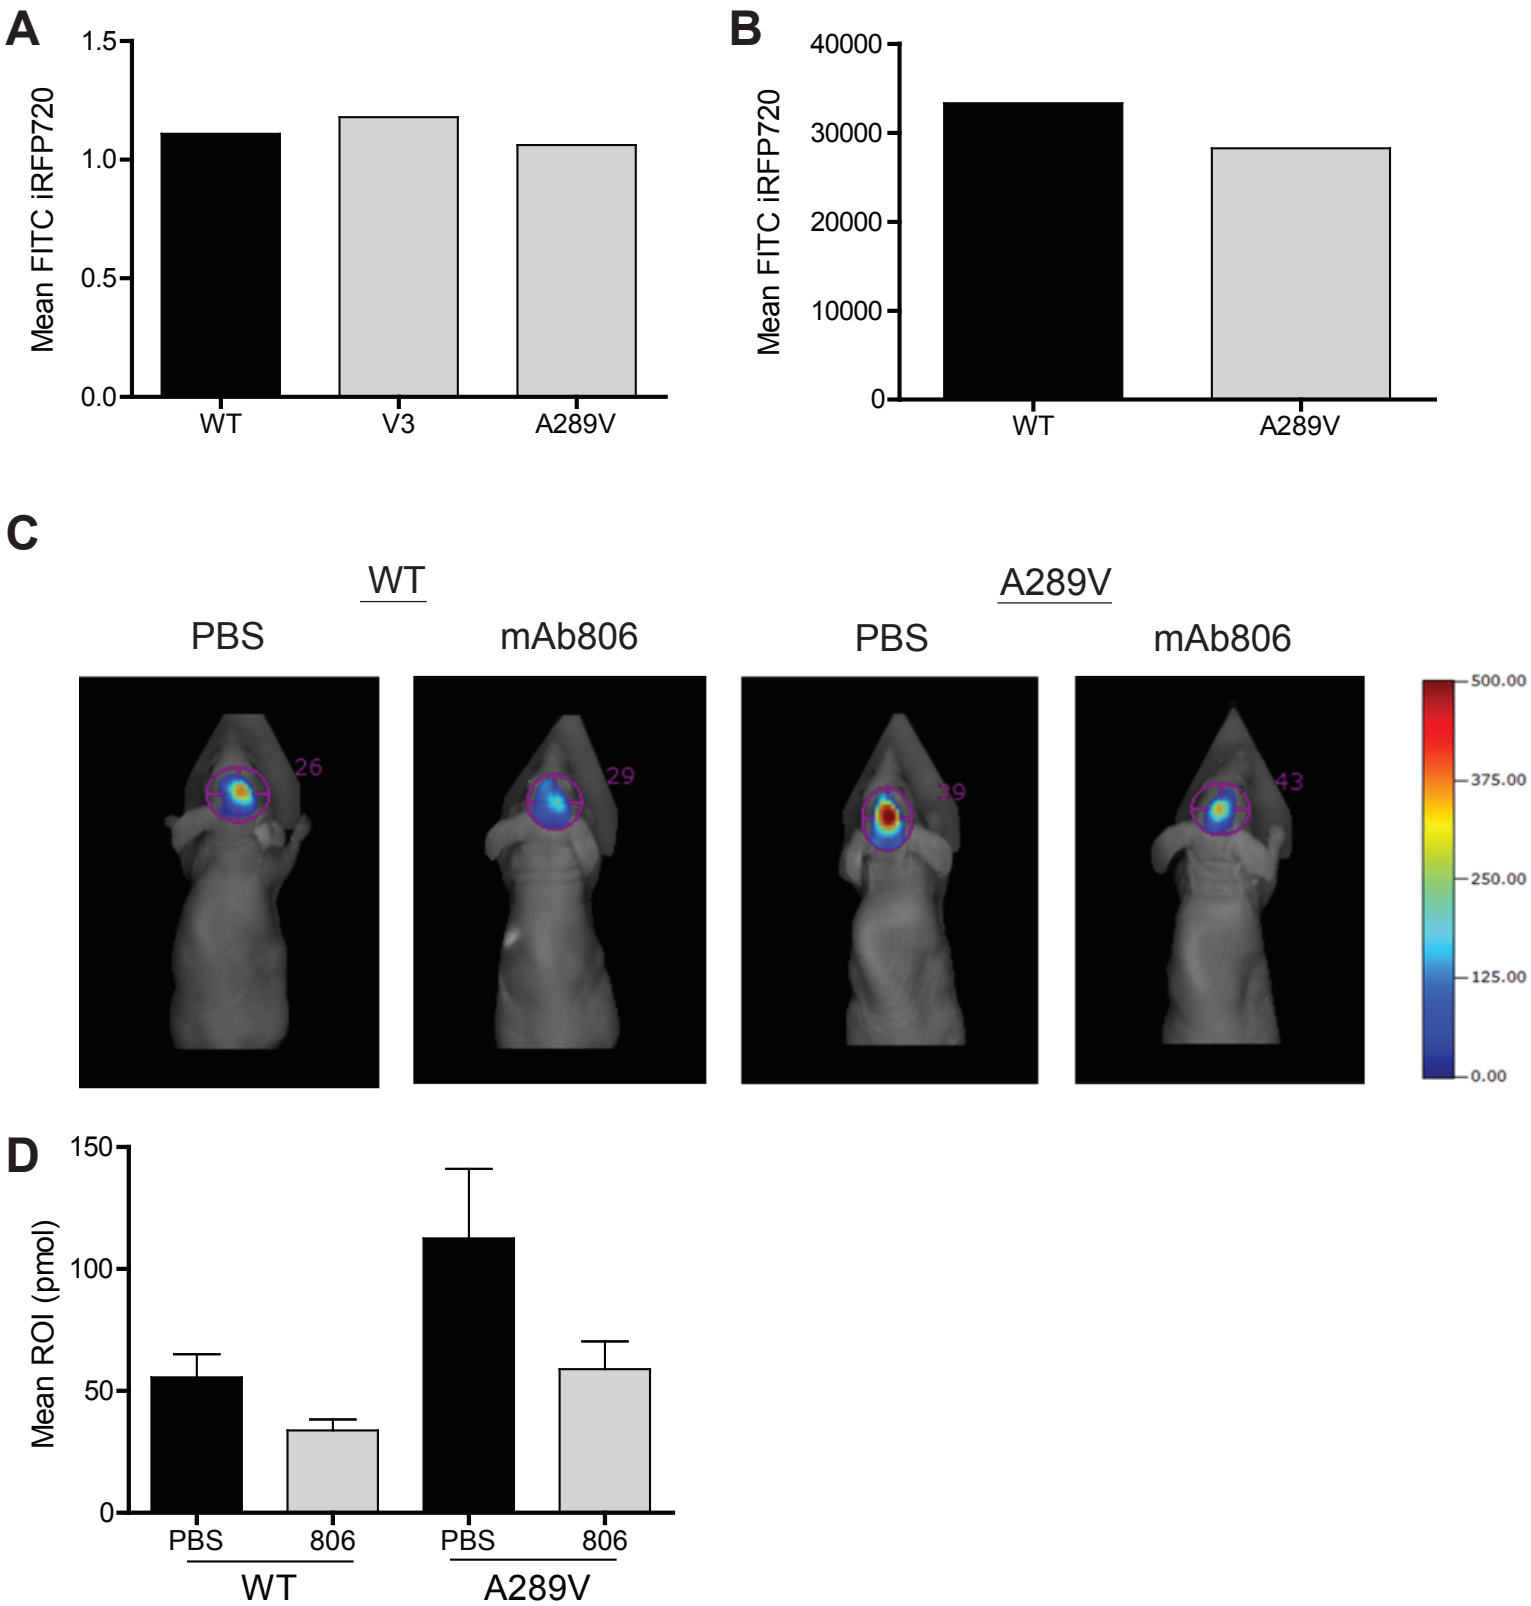

**Figure S7. Related to Figure 6.** (A and B) Flow cytometric analyses of U87-iRFP720 glioma cells (A) and HK281-iRFP720 GBM-spheres (B) expressing WT EGFR, EGFRvIII (V3), or EGFR<sup>A289V</sup>. (C) Representative images of HK281-iRFP720-expressing tumors as detected by fluorescence molecular topography (FMT) as described in Figure 6. (D) Quantification of FMT signal intensity on Day 12 post-implantation for each region of interest. Error bars are standard error of the mean.

**Table S4. Related to STAR Methods. Patient MRI specifics.**

|          | Dimensions (pixels) | Spatial Resolution (mm <sup>3</sup> ) | Slice Spacing (mm) | TI (ms) | TR (ms) | TE (ms) |
|----------|---------------------|---------------------------------------|--------------------|---------|---------|---------|
| T1       | 192x256x192         | 0.976x0.976x1                         |                    | 1       | 950     | 1760    |
| T1Gd     | 192x256x192         | 0.976x0.976x1                         |                    | 1       | 950     | 1760    |
| T2       | 208x256x64          | 0.938x0.938x3                         |                    | 3       |         | 4680    |
| T2-FLAIR | 192x256x64          | 0.938x0.938x3                         |                    | 3       | 2500    | 9420    |
| DSC-MRI  | 128x128x20          | 1.72x1.72x3                           |                    | 3       |         | 2000    |
| DTI      | 128x128x40          | 1.72x1.72x3                           |                    | 3       |         | 5000    |

**Table S5. Related to STAR Methods. Real time PCR primer sequences.**

| Primer Name | Forward                    | Reverse                  |
|-------------|----------------------------|--------------------------|
| MMP1        | GGTCTCTGAGGGTCAAGCAG       | AGTTCATGAGCTGCAACACG     |
| MMP2 v1     | GGAGTACTGCAAGTTCCCCT       | TCAGTGGTGCAGCTGTCATA     |
| MMP2 v2     | GGAGTACTGCAAGTTCCCCT       | TCAGTGGTGCAGCTGTCATA     |
| MMP9        | GAGACTCTACACCCAGGACG       | GAAAGTGGGGAAGACGC        |
| MMP14       | GCTGCCTACCGACAAGATTG       | TTCATCGCTGCCCATGAATG     |
| MMP19       | CAGCCTCGTTGTGGCCTAGA       | ACCAGCCTGCACCTCTTGGA     |
| MMP24       | GAACCTGTGGGCAAGACCTA       | TGACAACCAGAACTGAGCG      |
| GAPDH       | AAATCCCATCACCATCTTCCAGGAGC | CATGGTTCACACCCATGACGAACA |

Abbreviations: MMP, Matrix Metalloproteinase; GAPDH, glyceraldehyde-3-phosphate dehydrogenase.
